# Supplementary material
Source: ML conference proceedings conference paper supplement (https://proceedings.neurips.cc/paper_files/paper/2019/hash/16bda725ae44af3bb9316f416bd13b1b-Abstract.html)
Supplement: Supplementary file [file 16bda725ae44af3bb9316f416bd13b1b-Supplemental.zip]

# Supplementary Material

## A Proof of Lemma 3

*Proof of Lemma 3.* We first prove necessity. For any  $f \in \mathcal{F}$  and any empirical distribution  $z_i \sim P_n$ , by Assumption 3, there exists  $\lambda_{f,z_i}$  such that  $f(z') - f(z_i) \leq \lambda_{f,z_i} d_{\mathcal{Z}}(z_i, z')$  for any  $z' \in \mathcal{Z}$ , which leads to  $\sup_{z' \in \mathcal{Z}} \{f(z') - \lambda_{f,z_i} d_{\mathcal{Z}}(z_i, z') - f(z_i)\} = 0$ . Let  $\lambda^* = \max_i \{\lambda_{z_i, f}\}$ . Then, for any  $z_i \sim P_n$ , we have  $\sup_{z' \in \mathcal{Z}} \{f(z') - \lambda^* d_{\mathcal{Z}}(z_i, z') - f(z_i)\} = 0$ . Therefore,  $\psi_{f, P_n}(\lambda^*) = 0$  and the set  $\{\lambda : \psi_{f, P_n}(\lambda) = 0\}$  is nonempty. The sufficiency is obvious by the definition of  $\psi_{f, P_n}(\lambda)$ .

## B Proofs of Lemma 4 and 5

*Proof of Lemma 4.* If  $\epsilon_B \geq \frac{M}{\lambda_{f, P_n}^+}$ , by Proposition 1,  $R_{\epsilon_B, 1}(P_n, f) = \bar{\lambda} \epsilon_B + \mathbb{E}_{P_n}[\varphi_{\bar{\lambda}, f}(Z)]$ , we have

$$\bar{\lambda} \epsilon_B \leq R_{\epsilon_B, 1}(P_n, f).$$

Since  $f(z) \leq M$  for any  $z$ , we get  $R_{\epsilon_B, 1}(P_n, f) \leq M$ . So  $\bar{\lambda} \leq \frac{M}{\epsilon_B}$ .

For the other side, we first show that  $\psi_{f, P_n}(\lambda)$  is continuous and monotonically non-increasing. The monotonicity is easy to verify from the definition. For continuity, for any  $\lambda_2 > \lambda_1$ , suppose that

$$\begin{aligned} \hat{z} &= \sup_{z' \in \mathcal{Z}} \{f(z') - \lambda_1 d_{\mathcal{Z}}(z, z') - f(z)\}, \\ z^* &= \sup_{z' \in \mathcal{Z}} \{f(z') - \lambda_2 d_{\mathcal{Z}}(z, z') - f(z)\}. \end{aligned}$$

Then we have

$$\begin{aligned} &\psi_{f, P_n}(\lambda_1) - \psi_{f, P_n}(\lambda_2) \\ &= \mathbb{E}_{P_n}(\sup_{z' \in \mathcal{Z}} \{f(z') - \lambda_1 d_{\mathcal{Z}}(z, z') - f(z)\} - \sup_{z' \in \mathcal{Z}} \{f(z') - \lambda_2 d_{\mathcal{Z}}(z, z') - f(z)\}) \\ &\leq \mathbb{E}_{P_n}((\lambda_2 - \lambda_1) d_{\mathcal{Z}}(z, \hat{z})) \leq (\lambda_2 - \lambda_1) \text{diam}(\mathcal{Z}) \end{aligned}$$

So  $\psi_{f, P_n}(\lambda)$  is  $\text{diam}(\mathcal{Z})$ -Lipschitz and thus continuous.

Now we prove  $\bar{\lambda} \in [\lambda_{f, P_n}^-, \lambda_{f, P_n}^+]$ . If  $\lambda > \lambda_{f, P_n}^+$ , by the monotonicity and nonnegativity of  $\psi_{f, P_n}(\lambda)$ , we have  $\psi_{f, P_n}(\lambda) = \psi_{f, P_n}(\lambda_{f, P_n}^+) = 0$ , which implies  $\lambda \epsilon_B + \mathbb{E}_{P_n}[\varphi_{\lambda, f}(z)] \geq \lambda_{f, P_n}^+ \epsilon_B + \mathbb{E}_{P_n}[\varphi_{\lambda_{f, P_n}^+, f}(z)]$ . Therefore the optimal  $\bar{\lambda} \leq \lambda_{f, P_n}^+$ . To show  $\bar{\lambda} \geq \lambda_{f, P_n}^-$ , first notice that  $\psi_{f, P_n}(\lambda)$  belongs to  $[0, M]$  for any  $\lambda$ . We define

$$\lambda_{f, P_n}^- := \sup\{\lambda : \psi_{f, P_n}(\lambda) = \lambda_{f, P_n}^+ \cdot \epsilon_B\}.$$

Note that this set  $\{\lambda : \psi_{f, P_n}(\lambda) = \lambda_{f, P_n}^+ \cdot \epsilon_B\}$  might be empty if  $\psi_{f, P_n}(0) < \lambda_{f, P_n}^+ \cdot \epsilon_B < M$ . In this case, we just let  $\lambda_{f, P_n}^- = 0$ , and  $\bar{\lambda}$  must belong to  $[0, \lambda_{f, P_n}^+]$ . Otherwise, there must exist some  $\lambda \in [0, \lambda_{f, P_n}^+]$  which satisfies  $\psi_{f, P_n}(\lambda) = \lambda_{f, P_n}^+ \cdot \epsilon_B$  by the intermediate value theorem of a continuous function. We choose  $\lambda_{f, P_n}^-$  to be the maximal one in that set. Then, for any  $\lambda < \lambda_{f, P_n}^-$ , since  $\psi_{f, P_n}(\lambda)$  is monotonically non-increasing, we have

$$\mathbb{E}_{P_n}(\sup_{z' \in \mathcal{Z}} \{f(z') - \lambda d_{\mathcal{Z}}(z, z') - f(z)\}) \geq \lambda_{f, P_n}^+ \cdot \epsilon_B.$$

By rearranging the items on both sides, we obtain

$$\lambda \epsilon_B + \mathbb{E}_{P_n}[\varphi_{\lambda, f}(z)] \geq \lambda_{f, P_n}^+ \cdot \epsilon_B + \mathbb{E}_{P_n}(f(z))$$

for any  $\lambda < \lambda_{f, P_n}^-$ . Therefore,  $\bar{\lambda} \geq \lambda_{f, P_n}^-$ , and we complete the proof.

*Proof of Lemma 5.* Define the  $\Phi$ -indexed process  $X = (X_\varphi)_{\varphi \in \Phi}$  by

$$X_\varphi := \frac{1}{\sqrt{n}} \sum_{i=1}^n \sigma_i \varphi(z_i).$$

Note that  $\mathbb{E}[X_\varphi] = 0$  for all  $\varphi \in \Phi$ . First we show that  $X$  is a subgaussian process with respect to the pseudometric  $d_\Phi(\varphi, \varphi')$ , defined as

$$d_\Phi(\varphi, \varphi') := \|f - f'\|_\infty + \text{diam}(Z) \cdot |\lambda - \lambda'|$$

for  $\varphi = \varphi_{\lambda, f}$  and  $\varphi' = \varphi_{\lambda', f'}$ . From the definition of  $\varphi_{\lambda, f}$ , it is easy to show that  $\|\varphi - \varphi'\|_\infty \leq d_\Phi(\varphi, \varphi')$ . Then for any  $t \in \mathbb{R}$ , we can get

$$\begin{aligned} \mathbb{E}[\exp(t(X_\varphi - X'_{\varphi}))] &= \mathbb{E}\left[\exp\left(\frac{t}{\sqrt{n}} \sum_{i=1}^n \sigma_i(\varphi(z_i) - \varphi'(z_i))\right)\right] \\ &= \left(\mathbb{E}\left[\exp\left(\frac{t}{\sqrt{n}} \sigma_1(\varphi(z_1) - \varphi'(z_1))\right)\right]\right)^n \leq \exp\left(\frac{t^2 d_\Phi^2(\varphi, \varphi')}{2}\right), \end{aligned}$$

where the second equality is by the fact that  $(\sigma_i, z_i)$  are i.i.d., and the final inequality uses Hoeffding's lemma. Therefore,  $X$  is subgaussian with respect to  $d_\Phi$ . And the expected Rademacher complexity  $\mathfrak{R}_n(\Phi)$  can be bounded by the Dudley entropy integral [43]:

$$\mathfrak{R}_n(\Phi) \leq \frac{12}{\sqrt{n}} \int_0^\infty \sqrt{\log \mathcal{N}(\Phi, d_\Phi, u)} du,$$

where  $\mathcal{N}(\Phi, d_\Phi, \cdot)$  represents the covering numbers of  $(\Phi, d_\Phi)$ . By the definition of  $d_\Phi$ , it follows that

$$\mathcal{N}(\Phi, d_\Phi, u) \leq \mathcal{N}(\mathcal{F}, \|\cdot\|_\infty, u/2) \cdot \mathcal{N}([a, b], |\cdot|, \frac{u}{2 \cdot \text{diam}(Z)})$$

and therefore

$$\mathfrak{R}_n(\Phi) \leq \frac{12}{\sqrt{n}} \left( \int_0^\infty \sqrt{\log \mathcal{N}(\mathcal{F}, \|\cdot\|_\infty, u/2)} du + \int_0^\infty \sqrt{\log \mathcal{N}([a, b], |\cdot|, u/(2 \cdot \text{diam}(Z)))} du \right).$$

The second integral term could be easily obtained as follows

$$\int_0^\infty \sqrt{\log \mathcal{N}([a, b], |\cdot|, u/(2 \cdot \text{diam}(Z)))} du \leq (b - a) \cdot \text{diam}(z) \int_0^1 \sqrt{\log \frac{1}{u}} du = \frac{\sqrt{\pi}}{2} (b - a) \cdot \text{diam}(z).$$

Consequently,

$$\mathfrak{R}_n(\Phi) \leq \frac{12}{\sqrt{n}} \int_0^\infty \sqrt{\log \mathcal{N}(\mathcal{F}, \|\cdot\|_\infty, u/2)} du + \frac{6\sqrt{\pi}}{\sqrt{n}} (b - a) \cdot \text{diam}(Z).$$

## C Proof of Lemma 6

*Proof of Lemma 6.* For any  $f \in \mathcal{F}$ , define

$$\bar{\lambda} := \arg \min_{\lambda \geq 0} \{\lambda \epsilon_B + \mathbb{E}_{P_n}[\varphi_{\lambda, f}(Z)]\}.$$

Then using Proposition 1, we can write

$$\begin{aligned} R_{\epsilon_B, 1}(P, f) - R_{\epsilon_B, 1}(P_n, f) \\ = \min_{\lambda \geq 0} \left\{ \lambda \epsilon_B + \int_{\mathcal{Z}} \varphi_{\lambda, f}(z) P(dz) \right\} - \left( \bar{\lambda} \epsilon_B + \int_{\mathcal{Z}} \varphi_{\bar{\lambda}, f}(z) P_n(dz) \right) \leq \int_{\mathcal{Z}} \varphi_{\bar{\lambda}, f}(z) (P - P_n)(dz). \end{aligned}$$

By Lemma 4, we have  $\bar{\lambda} \in [\zeta_{f, P_n}^-, \zeta_{f, P_n}^+]$ . Define the function class  $\Phi := \{\varphi_{\lambda, f} : \lambda \in [\zeta^-, \zeta^+], f \in \mathcal{F}\}$ . Then, we have

$$R_{\epsilon_B, 1}(P, f) - R_{\epsilon_B, 1}(P_n, f) \leq \sup_{\varphi \in \Phi} \left[ \int_{\mathcal{Z}} \varphi(z) (P - P_n)(dz) \right].$$

Since all  $f \in \mathcal{F}$  takes values in  $[0, M]$ , the same holds for all  $\varphi \in \Phi$ . Therefore, by a standard symmetrization argument [34],

$$R_{\epsilon_B, 1}(P, f) - R_{\epsilon_B, 1}(P_n, f) \leq 2\mathfrak{R}_n(\Phi) + M \sqrt{\frac{\log(1/\delta)}{2n}}$$

with probability at least  $1 - \delta$ , where  $\mathfrak{R}_n(\Phi) := \mathbb{E}[\sup_{\varphi \in \Phi} \frac{1}{n} \sum_{i=1}^n \sigma_i \varphi(z_i)]$  is the expected Rademacher complexity of  $\Phi$ . Using the bound of Lemma 5, we get the desired result

$$R_{\epsilon_B, 1}(P, f) - R_{\epsilon_B, 1}(P_n, f) \leq \frac{24\mathfrak{C}(\mathcal{F})}{\sqrt{n}} + M \sqrt{\frac{\log(\frac{1}{\delta})}{2n}} + \frac{12\sqrt{\pi}}{\sqrt{n}} \Lambda_{\epsilon_B} \cdot \text{diam}(Z).$$

## D Proof of Theorem 1

*Proof of Theorem 1.* By Proposition 1,  $R_{\epsilon_B,1}(P_n, f)$  can be written as

$$\begin{aligned} R_{\epsilon_B,1}(P_n, f) &= \min_{\lambda \geq 0} \{ \lambda \epsilon_B + \mathbb{E}_{P_n} [\varphi_{\lambda, f}(z)] \} = \min_{\lambda \geq 0} \{ \lambda \epsilon_B + \mathbb{E}_{P_n} [\varphi_{\lambda, f}(z) - f(z)] \} + \mathbb{E}_{P_n} [f(z)] \\ &= \min_{\lambda \geq 0} \{ \lambda \epsilon_B + \psi_{f, P_n}(\lambda) \} + \frac{1}{n} \sum_{i=1}^n f(z_i) \end{aligned} ,$$

where the last equality uses the definition of  $\psi_{f, P_n}(\lambda)$ . Substituting the above equation into Lemma 6 and using inequality (1), we get result (3). To obtain (4), we make use of the following inequality

$$\min_{\lambda \geq 0} \{ \lambda \epsilon_B + \psi_{f, P_n}(\lambda) \} \leq \lambda_{f, P_n}^+ \epsilon_B + \psi_{f, P_n}(\lambda_{f, P_n}^+) = \lambda_{f, P_n}^+ \epsilon_B ,$$

where the equality follows from the definition of  $\lambda_{f, P_n}^+$ .

## E Proof of Corollary 1

*Proof of Corollary 1.* We first verify the assumption conditions in Theorem 1. Assumption 1 is evidently satisfied since  $\text{diam}(\mathcal{Z}) \leq (2r+1)$ . For each  $f \in \mathcal{F}$ , assumption 2 holds with  $M = 1 + \Lambda r$ . To verify assumption 3, we can write

$$\begin{aligned} f(z') - f(z) &\leq \max\{0, yw \cdot x - y'w \cdot x'\} \leq \max\{0, 2yw \cdot x \mathbb{1}_{(y \neq y')} + \|w\|_2 \|x' - x\|_2\} \\ &\leq \max\{2yw \cdot x, \|w\|_2\} d_{\mathcal{Z}}(z, z') \end{aligned} ,$$

where  $z = (x, y)$ . Then assumption 3 holds with  $\lambda_{f, z} = \max\{2yw \cdot x, \|w\|_2\}$ . Let  $\tilde{\lambda} = \max_i \{2y_i w \cdot x_i, \|w\|_2\}$ . By the definition of  $\psi_{f, P_n}(\cdot)$ , we have  $\psi_{f, P_n}(\tilde{\lambda}) = 0$ . Since  $\lambda_{f, P_n}^+$  is the smallest  $\lambda$  which satisfies  $\psi_{f, P_n}(\lambda) = 0$ , we get  $\lambda_{f, P_n}^+ \leq \max_i \{2y_i w \cdot x_i, \|w\|_2\}$ .

To evaluate the Dudley entropy integral, we need to estimate the covering numbers  $\mathcal{N}(\mathcal{F}, \|\cdot\|_{\infty}, u/2)$ . First observe, for any  $f_1, f_2 \in \mathcal{F}$ , we have

$$\|f_1 - f_2\|_{\infty} = \sup_{x \in \mathcal{X}, y \in \mathcal{Y}} |f_1(x, y) - f_2(x, y)| \leq \sup_{x \in \mathcal{X}, y \in \mathcal{Y}} |yw_1 \cdot x - yw_2 \cdot x| \leq \|w_1 - w_2\|_2 r.$$

Since  $w_1, w_2$  belong to a  $\Lambda$ -ball in  $\mathcal{R}^d$ ,

$$\mathcal{N}(\mathcal{F}, \|\cdot\|_{\infty}, u/2) \leq \left( \frac{6\Lambda r}{u} \right)^d$$

for  $0 < u < 2\Lambda r$ , and  $\mathcal{N}(\mathcal{F}, \|\cdot\|_{\infty}, u/2) = 1$  for  $u \geq 2\Lambda r$ , which gives

$$\int_0^{\infty} \sqrt{\log \mathcal{N}(\mathcal{F}, \|\cdot\|_{\infty}, u/2)} du \leq \int_0^{2\Lambda r} \sqrt{d \log \left( \frac{6\Lambda r}{u} \right)} du \leq 6\Lambda r \sqrt{d} .$$

Substituting this into expression (4), we get the desired result

$$R_P(f, \mathcal{B}) \leq \frac{1}{n} \sum_{i=1}^n f(z_i) + \lambda_{f, P_n}^+ \epsilon_B + \frac{144}{\sqrt{n}} \Lambda r \sqrt{d} + \frac{12\sqrt{\pi}}{\sqrt{n}} \Lambda_{\epsilon_B} \cdot (2r+1) + (1 + \Lambda r) \sqrt{\frac{\log(\frac{1}{\delta})}{2n}} .$$

## F Proof of Corollary 2

The goal of this section is to prove the adversarial expected risk for neural networks. To this end, it is necessary to first establish some properties of the margin operator  $\mathcal{M}(v, y) = v_y - \max_{j \neq y} v_j$  and the ramp loss  $l_{\gamma}$ .

**Lemma 7.** *For every  $j$ ,  $\mathcal{M}(\cdot, j)$  is 2-Lipschitz with respect to  $\|\cdot\|_2$ .*

*proof.* Let  $u, v$  and  $y$  be given. If  $\mathcal{M}(u, y) \geq \mathcal{M}(v, y)$ , denote the index  $j$  which satisfies that  $\mathcal{M}(v, y) = v_y - v_j$ . Then,

$$\mathcal{M}(u, y) - \mathcal{M}(v, y) = u_y - \max_{i \neq y} u_i - v_y + v_j \leq u_y - u_j - v_y + v_j \leq 2\|u - v\|_{\infty} \leq 2\|u - v\|_2.$$

Otherwise, let  $j$  be the index satisfying  $\mathcal{M}(u, y) = u_y - u_j$ , and we obtain

$$-2\|u - v\|_2 \leq \mathcal{M}(u, y) - \mathcal{M}(v, y).$$

Therefore,  $\mathcal{M}(\cdot, j)$  is 2-Lipschitz with respect to  $\|\cdot\|_2$ .

**Lemma 8.** For any  $f \in \mathcal{F}$ , we have  $\lambda_{f, P_n}^+ \leq C_4$  where  $C_4 := \max_j \left\{ \frac{2}{\gamma} \prod_{i=1}^L \rho_i \|A_i\|_\sigma, \frac{1}{\gamma} (\mathcal{M}(\mathcal{H}_{\mathcal{A}}(x_j), y_j) + \max \mathcal{H}_{\mathcal{A}}(x_j) - \min \mathcal{H}_{\mathcal{A}}(x_j)) \right\}$ .

*Proof.* By the definition of  $f$ , for any  $z$  and  $z'$ , we have

$$\begin{aligned}
& f(z') - f(z) \\
&= l_\gamma(-\mathcal{M}(\mathcal{H}_{\mathcal{A}}(x'), y')) - l_\gamma(-\mathcal{M}(\mathcal{H}_{\mathcal{A}}(x), y)) \\
&\leq \max\{0, \frac{1}{\gamma} (\mathcal{M}(\mathcal{H}_{\mathcal{A}}(x), y) - \mathcal{M}(\mathcal{H}_{\mathcal{A}}(x'), y'))\} \\
&\leq \max\{0, \frac{1}{\gamma} (\mathcal{M}(\mathcal{H}_{\mathcal{A}}(x), y') - \mathcal{M}(\mathcal{H}_{\mathcal{A}}(x'), y')) + \frac{1}{\gamma} (\mathcal{M}(\mathcal{H}_{\mathcal{A}}(x), y) - \mathcal{M}(\mathcal{H}_{\mathcal{A}}(x), y'))\} \\
&\leq \max\{0, \frac{2}{\gamma} |\mathcal{H}_{\mathcal{A}}(x) - \mathcal{H}_{\mathcal{A}}(x')| + \frac{1}{\gamma} (\mathcal{M}(\mathcal{H}_{\mathcal{A}}(x), y) - \mathcal{M}(\mathcal{H}_{\mathcal{A}}(x), y'))\} \\
&\leq \frac{2}{\gamma} \prod_{i=1}^L \rho_i \|A_i\|_\sigma \|x - x'\|_2 + \frac{1}{\gamma} (\mathcal{M}(\mathcal{H}_{\mathcal{A}}(x), y) + \max \mathcal{H}_{\mathcal{A}}(x) - \min \mathcal{H}_{\mathcal{A}}(x)) \mathbb{1}_{y \neq y'} \\
&\leq \max\left\{ \frac{2}{\gamma} \prod_{i=1}^L \rho_i \|A_i\|_\sigma, \frac{1}{\gamma} (\mathcal{M}(\mathcal{H}_{\mathcal{A}}(x), y) + \max \mathcal{H}_{\mathcal{A}}(x) - \min \mathcal{H}_{\mathcal{A}}(x)) \right\} d_{\mathcal{Z}}(z, z')
\end{aligned}$$

where the third inequality uses Lemma 7. Let  $C_4 = \max_j \left\{ \frac{2}{\gamma} \prod_{i=1}^L \rho_i \|A_i\|_\sigma, \frac{1}{\gamma} (\mathcal{M}(\mathcal{H}_{\mathcal{A}}(x_j), y_j) + \max \mathcal{H}_{\mathcal{A}}(x_j) - \min \mathcal{H}_{\mathcal{A}}(x_j)) \right\}$ . By the definition of  $\psi_{f, P_n}(\cdot)$ , we have  $\psi_{f, P_n}(C_4) = 0$ . Therefore,  $\lambda_{f, P_n}^+ \leq C_4$ .  $\square$

**Lemma 9.** For any two feedforward neural network  $\mathcal{H}_{\mathcal{A}}$  and  $\mathcal{H}_{\mathcal{A}'}$  where  $\mathcal{A} = (A_1, A_2, \dots, A_L)$  and  $\mathcal{A}' = (A'_1, A'_2, \dots, A'_L)$ , we have the following

$$\|\mathcal{H}_{\mathcal{A}}(x) - \mathcal{H}_{\mathcal{A}'}(x)\|_2 \leq \prod_{i=1}^L \rho_i s_i B \left( \sum_{j=1}^L \frac{\|A_i - A'_i\|_\sigma}{s_i} \right).$$

*Proof.* We prove this by induction. Let  $\Delta_i = \|\mathcal{H}_{\mathcal{A}}^i(x) - \mathcal{H}_{\mathcal{A}'}^i(x)\|_2$ . First observe

$$\Delta_1 = \|\sigma_1(A_1 x) - \sigma_1(A'_1 x)\|_2 \leq \rho_1 \|A_1 x - A'_1 x\|_2 \leq \rho_1 \|A_1 - A'_1\|_\sigma \|x\|_2 \leq \rho_1 B \|A_1 - A'_1\|_\sigma.$$

For any  $i \geq 1$ , we have the following

$$\begin{aligned}
& \Delta_{i+1} \\
&= \|\sigma_{i+1}(A_{i+1} \sigma_i(A_i \cdots \sigma_2(A_2 \sigma_1(A_1 x)))) - \sigma_{i+1}(A'_{i+1} \sigma_i(A'_i \cdots \sigma_2(A'_2 \sigma_1(A'_1 x))))\|_2 \\
&\leq \|\sigma_{i+1}(A_{i+1} \sigma_i(A_i \cdots \sigma_2(A_2 \sigma_1(A_1 x)))) - \sigma_{i+1}(A'_{i+1} \sigma_i(A_i \cdots \sigma_2(A_2 \sigma_1(A_1 x))))\|_2 + \\
&\quad \|\sigma_{i+1}(A'_{i+1} \sigma_i(A_i \cdots \sigma_2(A_2 \sigma_1(A_1 x)))) - \sigma_{i+1}(A'_{i+1} \sigma_i(A'_i \cdots \sigma_2(A'_2 \sigma_1(A'_1 x))))\|_2 \\
&\leq \rho_{i+1} \|A_{i+1} - A'_{i+1}\|_\sigma \|\sigma_i(A_i \cdots \sigma_2(A_2 \sigma_1(A_1 x)))\|_2 + \rho_{i+1} s_{i+1} \Delta_i \\
&\leq \rho_{i+1} \|A_{i+1} - A'_{i+1}\|_\sigma \prod_{j=1}^i \rho_j s_j B + \rho_{i+1} s_{i+1} \Delta_i
\end{aligned}$$

Therefore, using the induction step, we get the following

$$\begin{aligned}
& \Delta_{i+1} \\
&\leq \rho_{i+1} \|A_{i+1} - A'_{i+1}\|_\sigma \prod_{j=1}^i \rho_j s_j B + \rho_{i+1} s_{i+1} \Delta_i \\
&\leq \rho_{i+1} \|A_{i+1} - A'_{i+1}\|_\sigma \prod_{j=1}^i \rho_j s_j B + \prod_{j=1}^{i+1} \rho_j s_j B \left( \sum_{k=1}^i \frac{\|A_k - A'_k\|_\sigma}{s_k} \right) \\
&= \prod_{j=1}^{i+1} \rho_j s_j B \left( \sum_{k=1}^{i+1} \frac{\|A_k - A'_k\|_\sigma}{s_k} \right)
\end{aligned}$$

$\square$

We now return to the proof of Corollary 2.

*Proof of Corollary 2.* First we verify the three assumptions. Assumption 1 holds with  $\text{diam}(\mathcal{Z}) \leq 2r + 1$ . Assumption 2 is self-satisfied by the definition of ramp loss with  $0 \leq f(z) \leq 1$ . And

assumption 3 is guaranteed by Lemma 8 with  $\lambda_{f, P_n}^+ \leq C_4$ . Now we proceed to upper bound the covering number for  $\mathcal{F}$ . For any  $f$  and  $f'$ ,

$$\begin{aligned} \|f - f'\|_\infty &= \sup_z |f(z) - f'(z)| = \sup_z |l_\gamma(-\mathcal{M}(\mathcal{H}_{\mathcal{A}}(x), y)) - l_\gamma(-\mathcal{M}(\mathcal{H}_{\mathcal{A}'}(x), y))| \\ &\leq \sup_x \frac{2}{\gamma} \|\mathcal{H}_{\mathcal{A}}(x) - \mathcal{H}_{\mathcal{A}'}(x)\|_2 \leq \frac{2}{\gamma} \prod_{i=1}^L \rho_i s_i B \left( \sum_{j=1}^L \frac{\|A_j - A'_j\|_\sigma}{s_i} \right), \end{aligned}$$

where the last inequality applies Lemma 9. Since for any matrix  $A$ , we have  $\|A\|_\sigma \leq \|A\|_F$ . The above inequality can be written as

$$\|f - f'\|_\infty \leq \frac{2}{\gamma} \prod_{i=1}^L \rho_i s_i B \left( \sum_{j=1}^L \frac{\|A_j - A'_j\|_F}{s_i} \right).$$

Define  $u_j, a_j$  and  $\bar{a}$  as

$$u_j = \frac{s_j u a_j}{\frac{4}{\gamma} \prod_{i=1}^L \rho_i s_i B}, a_j = \frac{1}{\bar{a}} \left( \frac{b_j}{s_j} \right)^{1/2}, \bar{a} = \sum_{j=1}^L \left( \frac{b_j}{s_j} \right)^{1/2}.$$

So,

$$\frac{2}{\gamma} \prod_{i=1}^L \rho_i s_i B \left( \sum_{j=1}^L \frac{u_j}{s_j} \right) = \frac{u}{2}.$$

Then, the covering number  $\mathcal{N}(\mathcal{F}, \|\cdot\|_\infty, u/2)$  can be bounded by

$$\begin{aligned} &\int_0^\infty \sqrt{\log \mathcal{N}(\mathcal{F}, \|\cdot\|_\infty, u/2)} du \\ &\leq \int_0^\infty \sqrt{\sum_{i=1}^L \log \mathcal{N}(A_i, \|\cdot\|_F, u_i)} du \\ &= \int_0^\infty \sqrt{\sum_{i=1}^L \log \mathcal{N}(\{A_i : \|A_i\|_\sigma \leq s_i, \|A_i\|_F \leq b_i\}, \|\cdot\|_F, u_i)} du \\ &\leq \int_0^\infty \sqrt{\sum_{i=1}^L \log \mathcal{N}(\{A_i : \|A_i\|_F \leq b_i\}, \|\cdot\|_F, u_i)} du \\ &\leq \int_0^\infty \sum_{i=1}^L \sqrt{\log \mathcal{N}(\{A_i : \|A_i\|_F \leq b_i\}, \|\cdot\|_F, u_i)} du \end{aligned}$$

Since  $A_i \in \mathbb{R}^{d_i \times d_{i-1}}$ , we can regard  $A_i$  as a vector in  $\mathbb{R}^m$  with  $m = d_i \cdot d_{i-1}$  and  $\|\cdot\|_F$  as the standard Euclidean distance in  $\mathbb{R}^m$ . Then the set  $\{A_i : \|A_i\|_F \leq b_i\}$  forms a  $b_i$ -ball in  $\mathbb{R}^m$ , and the covering number for this ball could be upper bounded by

$$\mathcal{N}(\{A_i : \|A_i\|_F \leq b_i\}, \|\cdot\|_F, u_i) \leq \left( \frac{3b_i}{u_i} \right)^m \leq \left( \frac{3b_i}{u_i} \right)^{W^2}$$

for  $0 < u_i < b_i$ , and  $\mathcal{N}(\{A_i : \|A_i\|_F \leq b_i\}, \|\cdot\|_F, u_i) = 1$  for  $u_i \geq b_i$ . So,

$$\begin{aligned}
& \int_0^\infty \sqrt{\log \mathcal{N}(\mathcal{F}, \|\cdot\|_\infty, u/2)} du \\
& \leq \sum_{i=1}^L \left( \int_0^\infty \sqrt{\log \mathcal{N}(\{A_i : \|A_i\|_F \leq b_i\}, \|\cdot\|_F, u_i)} du_i \cdot \frac{\frac{4}{\gamma} \prod_{i=1}^L \rho_i s_i B}{s_i a_i} \right) \\
& \leq \sum_{i=1}^L \left( \int_0^{b_i} \sqrt{\log \mathcal{N}(\{A_i : \|A_i\|_F \leq b_i\}, \|\cdot\|_F, u_i)} du_i \cdot \frac{\frac{4}{\gamma} \prod_{i=1}^L \rho_i s_i B}{s_i a_i} \right), \\
& \leq \sum_{i=1}^L \frac{\frac{4}{\gamma} \prod_{i=1}^L \rho_i s_i BW}{s_i a_i} \int_0^{b_i} \sqrt{\log \frac{3b_i}{u_i}} du_i \\
& = \frac{12}{\gamma} \prod_{i=1}^L \rho_i s_i BW \sum_{i=1}^L \frac{b_i}{s_i a_i} \int_0^{\frac{1}{3}} \sqrt{\log \frac{1}{u_i}} du_i \\
& \leq \frac{12}{\gamma} \prod_{i=1}^L \rho_i s_i BW \bar{a}^2
\end{aligned}$$

where the last inequality uses  $\int_0^{\frac{1}{3}} \sqrt{\log \frac{1}{u_i}} du_i = \frac{1}{6}(2\sqrt{\log 3} + 3\sqrt{\pi} \operatorname{erfc}(\sqrt{\log 3})) < 1$ . Substituting it into Theorem 1, we obtain

$$\begin{aligned}
R_P(f, \mathcal{B}) & \leq \frac{1}{n} \sum_{i=1}^n f(z_i) + \lambda_{f, P_n}^+ \epsilon_{\mathcal{B}} + \sqrt{\frac{\log(1/\delta)}{2n}} + \frac{288}{\gamma \sqrt{n}} \prod_{i=1}^L \rho_i s_i BW \left( \sum_{i=1}^L \left( \frac{b_i}{s_i} \right)^{1/2} \right)^2 + \\
& \quad \frac{12\sqrt{\pi}}{\sqrt{n}} \Lambda_{\epsilon_{\mathcal{B}}} \cdot (2B + 1)
\end{aligned}$$
